# Supplementary material for: A ratiometric fluorescent probe for rapid and sensitive visualization of hypochlorite in living cells
Source: Royal Society of Chemistry journal article supplement (doi:10.1039/c4ra07009g), 2014-01-01
Supplement: c4ra07009g1.pdf [file c4ra07009g1.pdf]

## Electronic Supplementary Information for

### A Ratiometric Fluorescent Probe for Rapid and Sensitive Visualizing Hypochlorite in Living Cells

Jiayu Zha,<sup>a</sup> Boqiao Fu,<sup>b</sup> Caiqin Qin,<sup>b</sup> Lintao Zeng<sup>\*a,b</sup> and Xichao Hu<sup>\*b</sup>

<sup>a</sup> School of Chemistry & Chemical Engineering, Tianjin University of Technology,  
Tianjin 300384, PR China. Fax: +86 22 60214252; E-mail: zlt1981@126.com

<sup>b</sup> Department of Chemistry and Material Sciences, Hubei Engineering University,  
Hubei Xiaogan 432000, PR China. Fax: +86 712 2345265.

#### Table of Contents

1. Experimental section
2. Synthesis of probe **CMCY**
3. Fluorescence responses of **CMCY** to various species in PBS solution
4. Cell culture and fluorescence imaging
5. The proposed sensing mechanism of probe **CMCY** to ClO<sup>-</sup>
6. <sup>1</sup>H NMR, <sup>13</sup>C NMR spectra and HRMS spectrum

## 1. Experimental section

### 1.1 General

Reagents and Instrumentation. All chemicals and solvents were of analytical grade and were used without further purifications. The  $^1\text{H}$  NMR and  $^{13}\text{C}$  NMR spectra were recorded on a Bruker AV-400 spectrometer with tetramethylsilane (TMS) as the internal standard. The chemical shift was recorded in ppm and the following abbreviations were used to explain the multiplicities: s = singlet, d = doublet, t = triplet, m = multiplet, br = broad. Mass spectra were measured on a HP-1100 LC-MS spectrometer. UV-vis spectra were recorded on Hitachi spectrometer. Fluorescence spectra were recorded on a Hitachi FL-4500 fluorometer. Fluorescent images were acquired on a Nikon A1 confocal laser-scanning microscope with a 60 objective lens. The solvents used for UV-vis and fluorescence measurements are of HPLC grade.

### 1.2 Synthesis of probe

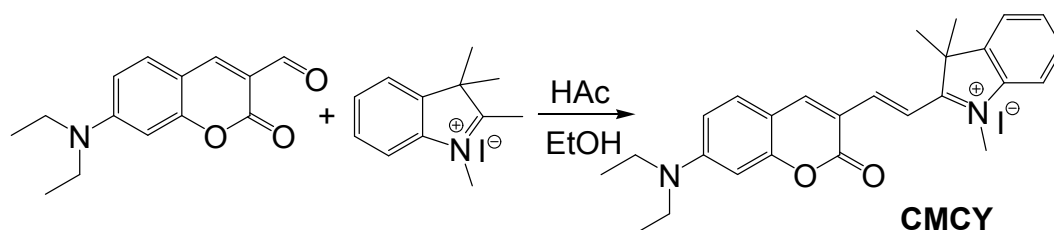

1-Methyl-2,3,3-trimethyl-3H-indolium (133 mg, 0.44 mmol) and diethylamino coumarin-aldehyde (104 mg, 0.42 mmol) were placed in a round bottom flask with 20 mL anhydrous ethanol. Then, two drops of acetic acid and piperidine were added. The reaction mixture was refluxed for 6 h. After the reaction was completed, the solvent was removed under reduced pressure, and the resulting residue was purified by column chromatography. ( $\text{CH}_2\text{Cl}_2/\text{C}_2\text{H}_5\text{OH} = 15:1$ ) on silica gel to give the product **CMCY** as a purple powder (142 mg, yield: 61%).  $^1\text{H}$  NMR (400 MHz,  $\text{CDCl}_3$ )  $\delta$  10.11 (s, 1H), 8.62 (d,  $J = 16.0$  Hz, 1H), 8.15 (d,  $J = 10.0$  Hz, 1H), 8.04 (d,  $J = 16.0$  Hz, 1H), 7.60 – 7.50 (m, 3H), 7.45 (t,  $J = 7.6$  Hz, 1H), 6.72 (dd,  $^1J = 7.2$  Hz,  $^3J = 2.4$  Hz, 1H), 6.48 (d,  $^3J = 2.4$  Hz, 1H), 4.33 (s, 3H), 3.54 (q,  $J = 7.2$  Hz, 4H), 1.85 (s, 6H), 1.30 (t,  $J = 7.2$  Hz, 6H).  $^{13}\text{C}$  NMR (100 MHz,  $\text{d}^6\text{-DMSO}$ ):  $\delta$  181.3, 169.8, 158.0, 154.4, 150.6, 149.7, 143.5, 142.4, 132.8, 129.4, 129.0, 123.2, 114.9, 112.7, 111.8,

110.6, 109.8, 97.1, 51.9, 45.3, 34.2, 26.3, 13.0. HRMS (ESI)  $m/z$  calcd for  $C_{26}H_{29}N_2O_2$  ( $M^+$ ): 401.2260. Found 401.2236.

### 1.3 Determination of the detection limit

The fluorescence spectrum of **CMCY** was measured three times and the standard deviation of a blank measurement was achieved. The fluorescence intensity ratio ( $I_{480}/I_{631}$ ) was plotted as a concentration of  $ClO^-$ . The detection limit was calculated by using the equation: detection limit =  $3\sigma/k$ : where  $\sigma$  is the standard deviation of the blank measurement,  $k$  is the slope between the fluorescence ratios versus  $ClO^-$  concentration.

### 1.4 Cell culture and fluorescence imaging

HeLa cells (Perking Union Medical College, China) were cultured in Dulbecco's modified Eagle's medium (DMEM), supplemented with 10% fetal bovine serum (Invitrogen Corp., Carlsbad, CA) and penicillin (100 units/mL)-streptomycin (100  $\mu\text{g/mL}$ ) liquid (Invitrogen Corp., Carlsbad, CA) at 37 °C in a humidified incubator containing 5%  $CO_2$  in air. The cells were incubated for 2 days before dye loading on an uncoated 35 mm diameter glass-bottomed dish (D110100, Matsunami, Japan). Then, the cells were rinsed with PBS, incubated with DMEM containing 10% FBS, 5  $\mu\text{M}$  probe **CMCY** for 10 min at 37 °C, washed with PBS twice, and mounted on the microscope stage. Fluorescence images were captured using a Nikon A1 Application. The cells were furthermore incubated with 50  $\mu\text{M}$   $Ca(ClO)_2$  for 30 minutes, and then washed with PBS twice for confocal laser-scanning microscopy measurement. Fluorescence images were captured using a Nikon A1 Application.

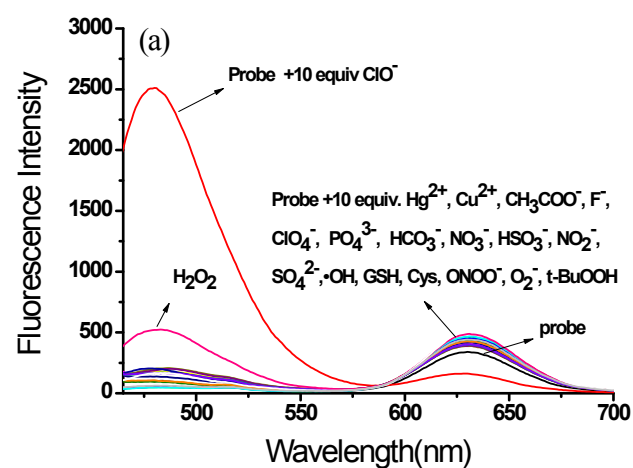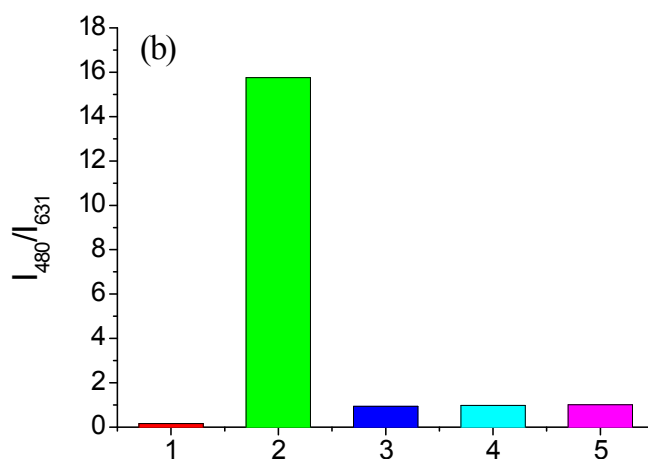

**Fig. S1** (a) Fluorescence responses of **CMCY** (10  $\mu$ M) to various species (10 equiv.) in PBS solution (50 mM, pH = 7.40); (b) Fluorescence response of **CMCY** (10  $\mu$ M) in PBS solution, pH = 7.4) to H<sub>2</sub>O<sub>2</sub> with various concentrations. 1, blank; 2, 10 equiv. ClO<sup>-</sup>; 3, 20 equiv. H<sub>2</sub>O<sub>2</sub>; 4, 40 equiv. H<sub>2</sub>O<sub>2</sub>; 5, 60 equiv. H<sub>2</sub>O<sub>2</sub>;  $\lambda_{ex}$  = 460 nm. The data were collected after ClO<sup>-</sup> was added into the **CMCY** (10  $\mu$ M) solution for 20 minute.

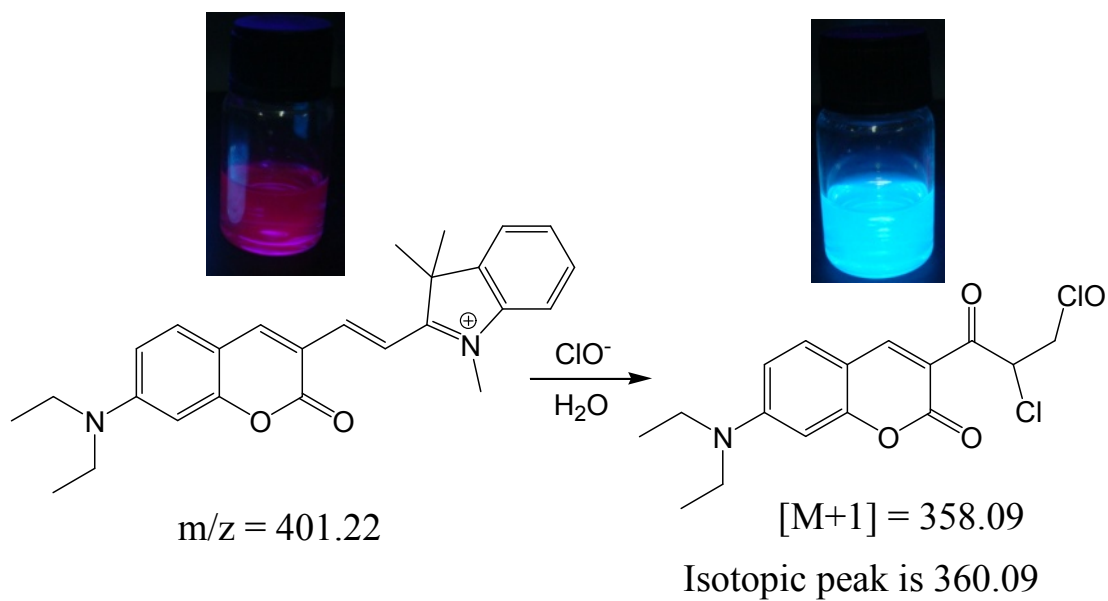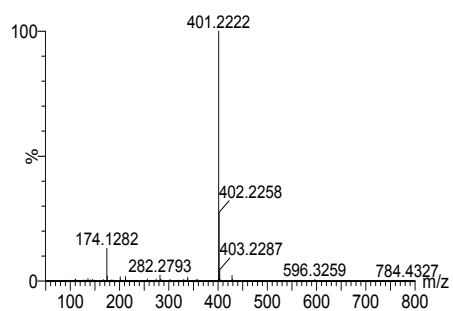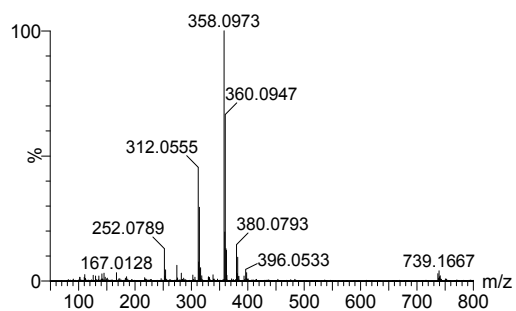

**Fig. S2** The proposed mechanism for sensing of  $\text{ClO}^-$

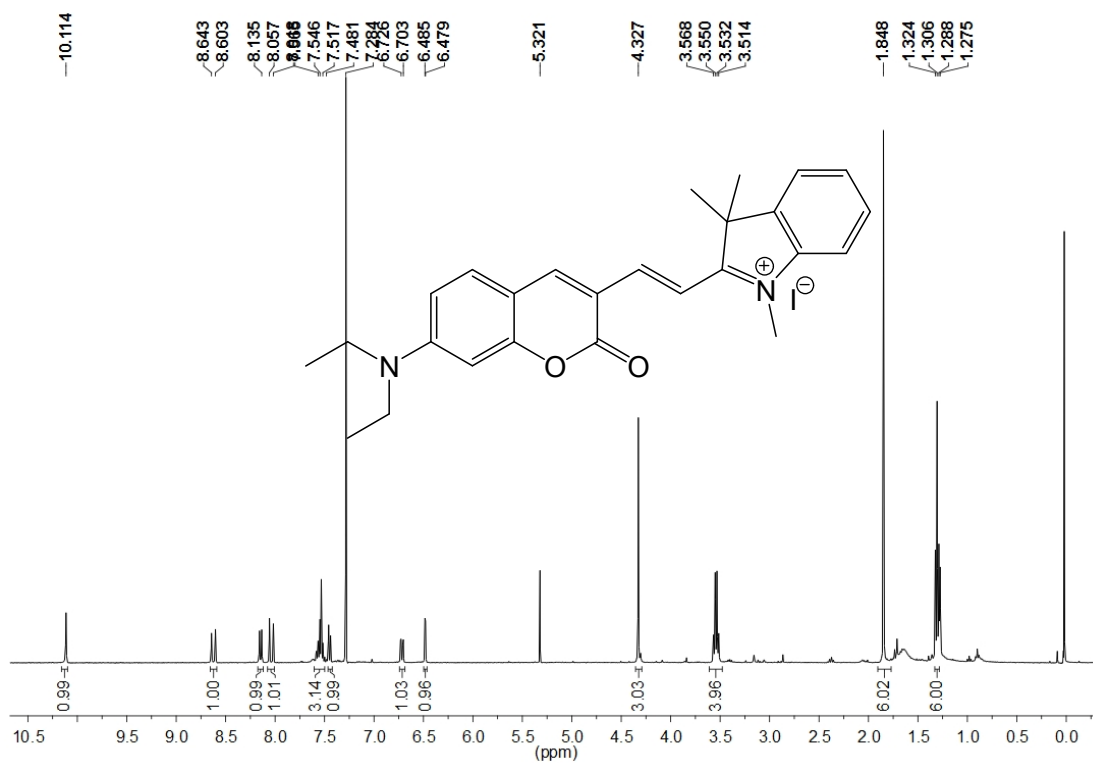

Fig. S3  $^1\text{H}$  NMR spectrum of CMCY in  $\text{CDCl}_3$  (400 MHz)

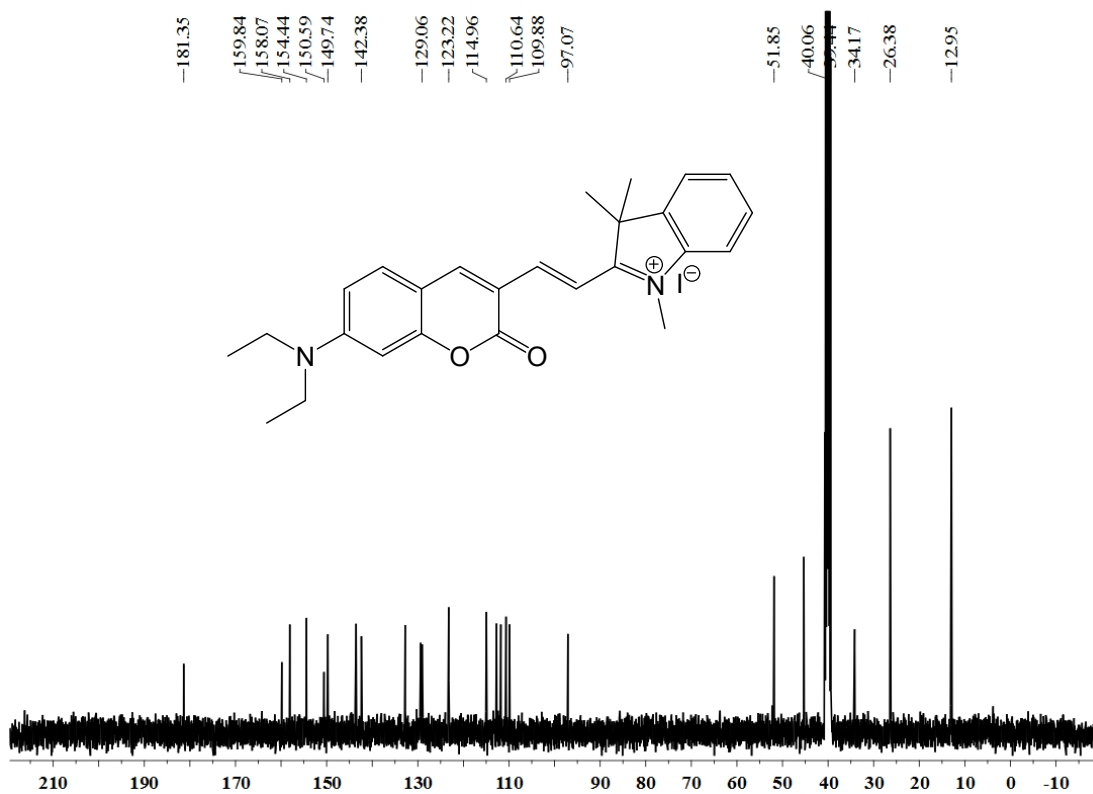

Fig. S4  $^{13}\text{C}$  NMR spectrum of CMCY in  $\text{d}^6\text{-DMSO}$  (100 MHz)

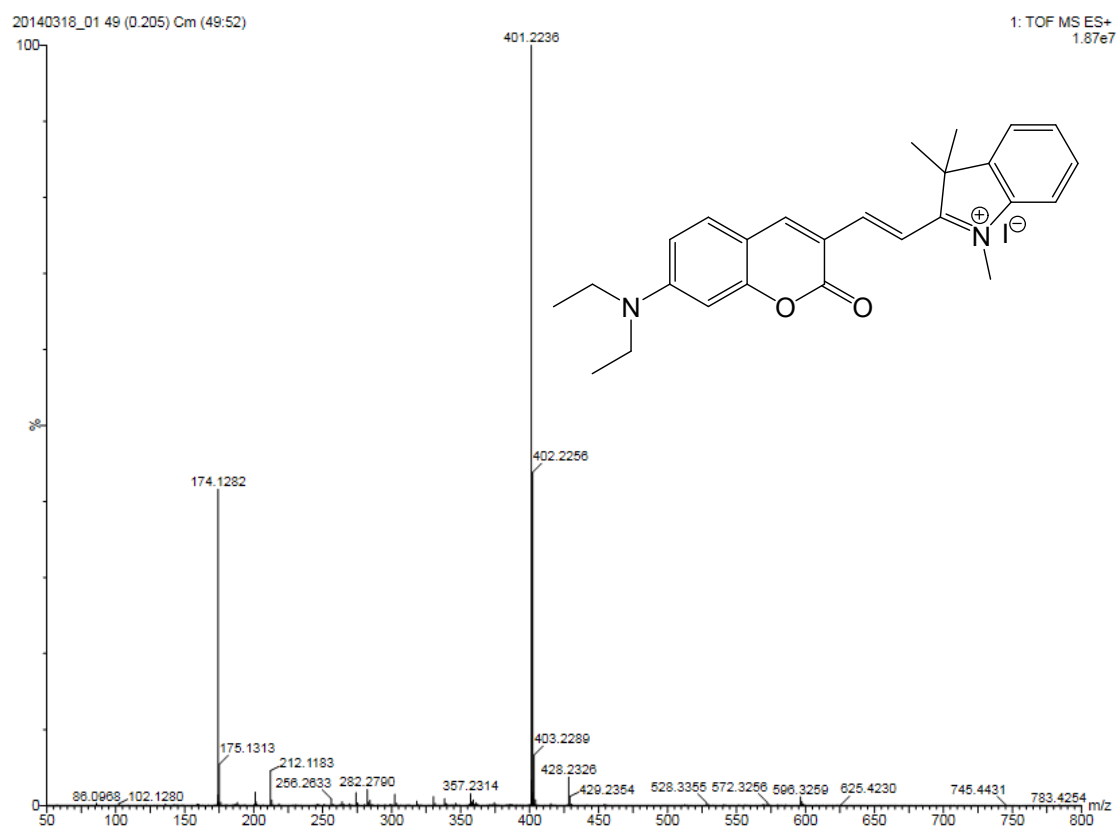

**Fig. S5** HR-MS (ESI) spectrum of CMCY
